# Supplementary material for: Topical hypochlorite ameliorates NF-κB–mediated skin diseases in mice
Source: JCI journal article supplement (doi:10.1172/jci70895), 2013-11-14
Supplement: sd1 [file 1]

Supplementary Materials:

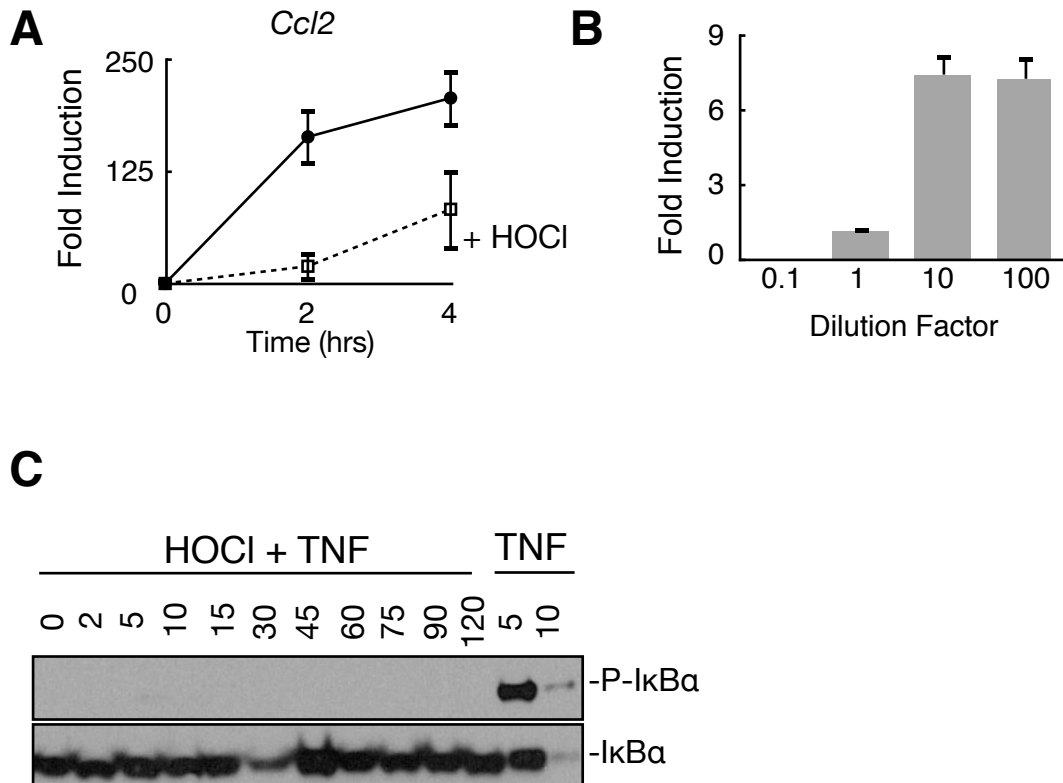

**Figure S1. Hypochlorite inhibits NF-κB signaling in a dose-dependent manner. (A)** Relative mRNA transcript levels of *Ccl2* in TNF $\alpha$ -stimulated mouse wild-type (WT) cells with (dotted line) and without (solid line) hypochlorite (HOCl) pretreatment. **(B)** Relative luciferase levels in TNF $\alpha$ -stimulated transgenic WT cells carrying an integrated NF-κB-reporter gene driving luciferase with serial dilutions of hypochlorite pre-treatment. **(C)** Western blot analysis of IκB $\alpha$  and phospho-IκB $\alpha$ -Ser32 levels in TNF $\alpha$ -stimulated wild-type cells with and without HOCl pretreatment. Data presented as average  $\pm$  s.e.m.

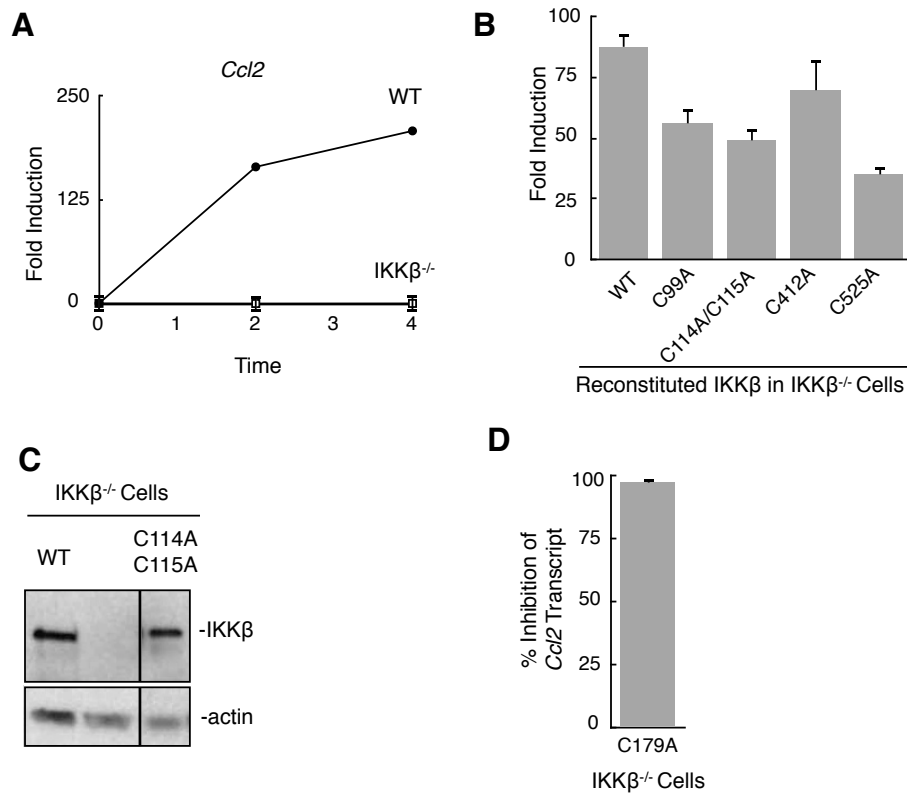

**Figure S2. Rescue of IKK $\beta$ <sup>-/-</sup> with a human IKK $\beta$  transgene. (A)** Relative mRNA transcript levels of *Ccl2* in TNF $\alpha$ -stimulated IKK $\beta$ -deficient mouse embryonic fibroblasts (MEFs). **(B)** Relative mRNA transcript levels of *Ccl2* in TNF $\alpha$ -stimulated IKK $\beta$ -deficient MEFs reconstituted with indicated missense variants of human IKK $\beta$  (variants with substitution of cysteine by alanine are denoted as C99A, C114A/C115A, C412A, and C525A. C114A/C115A is a double-mutant.) at 4 hours. **(C)** Western blot analysis of IKK $\beta$  protein levels in IKK $\beta$ -deficient MEFs reconstituted with human IKK $\beta$  (WT) and IKK $\beta$  C114A/C115A. Black lines indicate grouping of images from different parts of the same gel. **(D)** Percent inhibition of *Ccl2* mRNA transcript levels in TNF $\alpha$ -stimulated IKK $\beta$ -deficient cells complemented with C179A IKK $\beta$  transgene. Data presented as average  $\pm$  s.e.m.

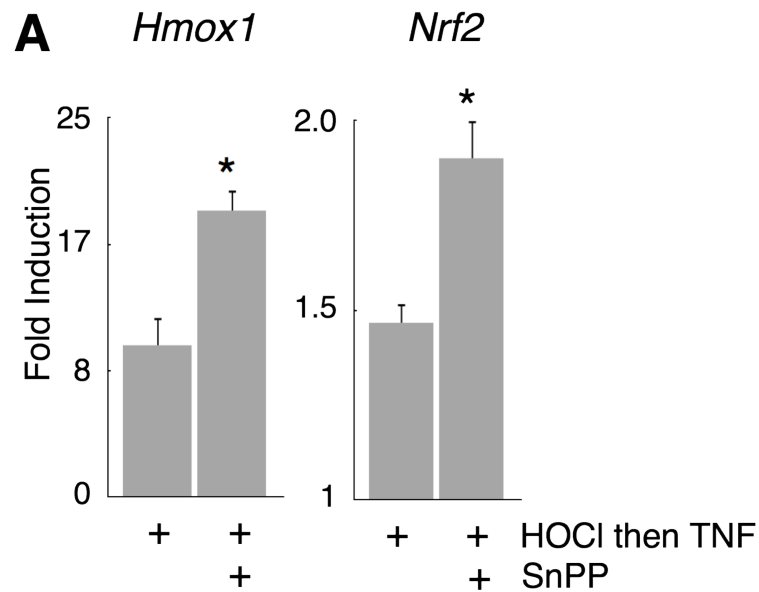

**Figure S3. Tin Protoporphyrin Increases Oxidative Stress in wild-type fibroblasts.** (A) Relative mRNA transcript levels of *Hmox1* and *Nrf2* in hypochlorite (HOCl)-pretreated TNF $\alpha$ -stimulated mouse wild-type cells with and without tin protoporphyrin (SnPP). \* P < 0.004. Data presented as average  $\pm$  s.e.m.

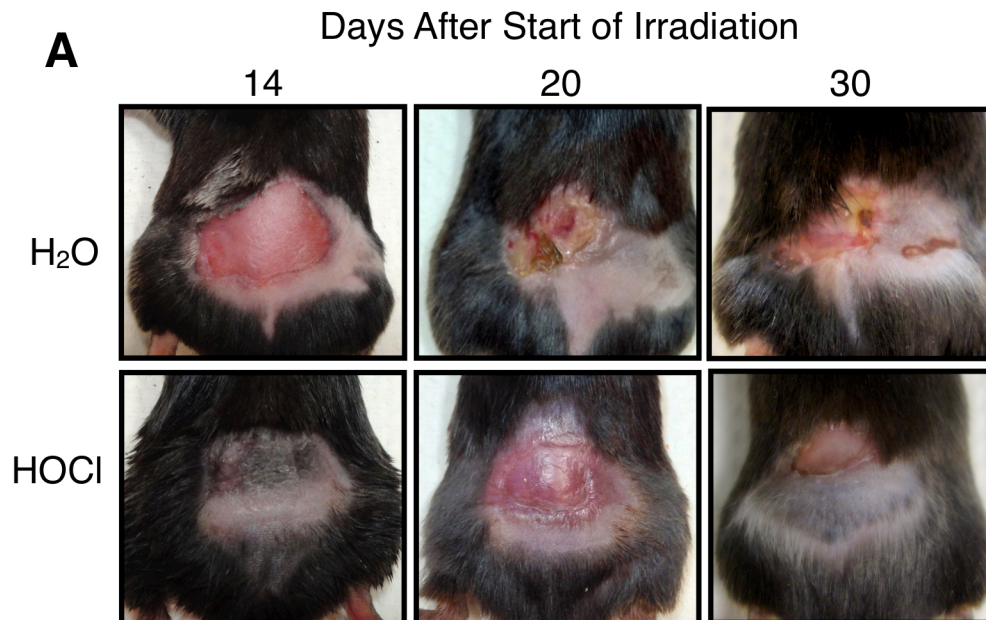

**Figure S4. Hypochlorite attenuates acute radiation dermatitis. (A)** Low magnification photographs taken of the back skin on days 14, 20, and 30 after start of irradiation. Pictures are representative images from each group.

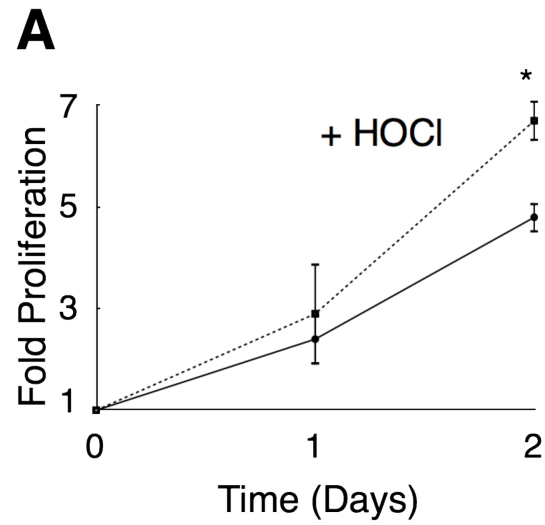

**Figure S5. Hypochlorite Stimulates Proliferation in Human Keratinocytes.** (A) Primary human keratinocytes were grown in standard conditions with and without 1-hour daily pulse treatments with hypochlorite (HOCl). \*  $P=0.002$ . Data presented as average  $\pm$  s.e.m.

Primer Sequences

Ccl2 F AAGGAATGGGTCCAGACATAC  
Ccl2 R CTGAAGACCTTAGGGCAGAT

Gapdh F ACCTGCCAAGTATGATGACATCA  
Gapdh R CCCTCAGATGCCTGCTTCAC

Cxcl10 F AGGACGGTCCGCTGCAA  
Cxcl10 R CATTCTCACTGGCCCGTCAT
